# Supplementary material for: Temporal Gene Expression Analysis and RNA Silencing of Single and Multiple Members of Gene Family in the Lone Star Tick Amblyomma americanum
Source: PubMed Central journal article supplement (PMC4752215; doi:10.1371/journal.pone.0147966), 2016-02-12
Supplement: pone.0147966.s001.pdf [file pone.0147966.s001.pdf]

**Table S1:** Expression Stability of seven candidate reference genes for tick salivary glands as calculated by Bestkeeper,  $\Delta\Delta\text{Ct}$ , and NormFinder.

| Rank | Bestkeeper  |      | $\Delta\Delta\text{Ct}$ |       | NormFinder  |           |
|------|-------------|------|-------------------------|-------|-------------|-----------|
|      | Gene        | SD   | Gene                    | SD    | Gene        | Stability |
| 1    | Ubiquitin   | 0.27 | Ubiquitin               | 0.22  | Actin       | 0.068     |
| 2    | Actin       | 0.53 | Actin                   | 1.24  | Calrectulin | 0.069     |
| 3    | GAPDH       | 0.69 | Histone H3              | 1.41  | Ubiquitin   | 0.072     |
| 4    | Calrectulin | 0.96 | GAPDH                   | 1.45  | HSP         | 0.134     |
| 5    | HSP         | 1.11 | Calrectulin             | 7.18  | GST         | 0.140     |
| 6    | Histone H3  | 1.49 | HSP                     | 7.27  | Histone H3  | 0.169     |
| 7    | GST         | 1.67 | GST                     | 20.83 |             |           |
