# Supplementary material for: Temporal Gene Expression Analysis and RNA Silencing of Single and Multiple Members of Gene Family in the Lone Star Tick Amblyomma americanum
Source: PubMed Central journal article supplement (PMC4752215; doi:10.1371/journal.pone.0147966), 2016-02-12
Supplement: pone.0147966.s002.pdf [file pone.0147966.s002.pdf]

**Table S2:** Expression stability of seven candidate reference genes for tick midguts as calculated by Bestkeeper,  $\Delta\Delta C_t$  values, and NormFinder.

| Rank | Bestkeeper   |      | $\Delta\Delta C_t$ |       | NormFinder   |           |
|------|--------------|------|--------------------|-------|--------------|-----------|
|      | Gene         | SD   | Gene               | SD    | Gene         | Stability |
| 1    | Histone H3   | 0.25 | Histone H3         | 0.31  | Calreticulin | 0.058     |
| 2    | GADPH        | 0.70 | GADPH              | 0.55  | HSP          | 0.088     |
| 3    | Actin        | 0.78 | Ubiquitin          | 0.78  | Histone H3   | 0.175     |
| 4    | Calreticulin | 0.86 | Calreticulin       | 1.69  | Actin        | 0.217     |
| 5    | HSP          | 0.90 | HSP                | 2.37  | GST          | 0.375     |
| 6    | Ubiquitin    | 1.08 | Actin              | 2.60  | Ubiquitin    | 0.570     |
| 7    | GST          | 1.11 | GST                | 10.75 |              |           |
