# Supplementary material for: Temporal Gene Expression Analysis and RNA Silencing of Single and Multiple Members of Gene Family in the Lone Star Tick Amblyomma americanum
Source: PubMed Central journal article supplement (PMC4752215; doi:10.1371/journal.pone.0147966), 2016-02-12
Supplement: pone.0147966.s003.pdf [file pone.0147966.s003.pdf]

**Table S3: Classification of genes and their respective primers.**

| <b>Gene Classification</b> | <b>Gene Name</b>                  | <b>Forward Primer 5'→3'</b> | <b>Reverse Primer 5'→3'</b> |
|----------------------------|-----------------------------------|-----------------------------|-----------------------------|
| Housekeeping genes         | Aa GAPDH                          | CTTCTTGGCACCTCCATCAA        | GGTGCAGAGTTTGTGGTAGAG       |
|                            | Aa Histone H3<br>(GI:759084459)   | GAAGCCAGTGAGGCATACTT        | GCTCGATATCCTTTGGCATGA       |
|                            | Aa Calreticulin<br>(GI:3924592)   | ACTACAAGGGCAAGAACCACCTCA    | TCGATCTGCTTGGGTTTCCACTCA    |
|                            | Aa GST<br>(GI:196476640)          | CTTCCCGAATTTGCCCTACTA       | CGTCAAGACCGTGCTTCTTT        |
|                            | Aa Ubiquitin<br>(GI:759085449)    | GCTGTCCGACTACAACATTCA       | GGGTGGTGTAGTTCTTCTTCTT      |
|                            | Aa β-Actin<br>(GI:759085843)      | TCCTATCCTCACCTGAAGTA        | ACGCAGCTCGTTGTACAAG         |
|                            | Aa HSP<br>(GI:196476687)          | CTCTTGTACGCAGGCTTCTTA       | TATCATGATGCCGCCCTT          |
| Protease Inhibitor Domains | Aam-36184<br>(GI:759087923)       | TCCTATACGCACTGCTCCGT        | CGGGGAGTTGATAATATAGCGA      |
|                            | Aam-41471<br>(GI:759087921)       | ACCTGCTTCTTATACGCCCT        | AGTTGTTGTTATTTCCGCCG        |
|                            | AamerSigP-40989<br>(GI:759089359) | ATGCAGCTCCTCACGATTTT        | CCACCCTTTGTGGTTGGTAG        |
|                            | Aam-35414<br>(GI:759088299)       | TCATAGCCGTACTCAGCGTG        | TTGAGCACAAATCCTCATGC        |
|                            | AamerSigP-41415<br>(GI:759088597) | CATGAGACACCCGAGCTGTA        | CAAAGGCCGCTTTTAGAGTG        |
|                            | AamerSigP-26789<br>(GI:759087891) | CACTCTCAGTGGTTTTTCGCA       | CCAGAGTTGCCAGCAGTTTT        |

|                          |                                   |                        |                        |
|--------------------------|-----------------------------------|------------------------|------------------------|
| Lipocalins               | Aam-41264<br>(GI:759089713)       | GGCATCAATGGAAGTTGCTT   | GTGTGTGAACGGACTGAACG   |
|                          | Aam-41091<br>(GI:759089695)       | TGAAACTAAACTCCGCTGCC   | CATGTTAACCGTGCCACTTG   |
|                          | AamerSigP-40605<br>(GI:759089699) | GGCACCAAACGTTTCATCTTT  | GCCATTCTTTATGCGGACAT   |
|                          | AamerSigP-12055                   | GATTGTGTGGAATTGCCTCC   | TTGTGTTCAGGCTGTGGTTC   |
|                          | AamerSigP-33384<br>(GI:759088385) | TCATTTTTGATGCTCGTTGG   | CATATGTTTTGCTCACGTCCA  |
|                          | Aam-41375<br>(GI:759089833)       | TTCTTTTCAACGGACCCAAG   | CTGGTTTTTGGCATCCAAC    |
|                          | AamerSigP-18604                   | TCTTGCCATAACCGCTTTTC   | AAATCACTTCCGTCACCAGG   |
| Glycine Rich<br>Proteins | Aam-41235<br>(GI:759088199)       | AGCAGCCTCTCCAGTAGTGC   | TCTGGAGAGCCCACCAATAC   |
|                          | AamerSigP-34358<br>(GI:759089759) | TGCGAGGAGAAAGTGGAAGT   | ATAATGGGACCAGGGTTTCC   |
|                          | Aam-40766<br>(GI:759090089)       | GATTTGGTGGCTCACTTGGT   | AAGACCAGTGCCAAATCCAC   |
|                          | AamerSigP-39259                   | AGACTTTCTTGGCATGCTCC   | ACTTCCACTTTCTCCTGGCA   |
|                          | AamerSigP-41913<br>(GI:759088551) | GTGGAGCTGAAACCTCTGTTAG | TCTGGAGTCTCACCTTCATCTC |
|                          | AamerSigP-41539<br>(GI:759088517) | GCTAGATGACGCTGGGTTT    | TCCAAGGTTTCCAGAGTTGTAG |
|                          | Aam-41540<br>(GI:759086339)       | GGGAAATCTTGGCGGTATCT   | GCCTCCATACCATCCGTTAAA  |
|                          | Aam-36909                         | AGCGGTGGATACAGTTTCTATG | TCCAAGACCAGTGCCAAATC   |

|                                           |                                   |                       |                       |
|-------------------------------------------|-----------------------------------|-----------------------|-----------------------|
|                                           | (GI:759090119)                    |                       |                       |
|                                           | Aam-3099<br>(GI:759089715)        | GCCTTCTGTCAGCTGTATGT  | CGGCGTAGAGATTACCCTTTC |
| Tick Specific Genes<br>(Unknown Function) | AamerSigP-40930                   | ATGAATGCGGCAAAGCTG    | TATGGCTCCGGCTGTGTA    |
|                                           | AamerSigP-41354                   | GCAATGATGGTCTTTCGGTC  | TCTGCAGTAGCCTGGTCCTC  |
|                                           | AamerSigP-41425                   | CACTTCTCTGCGTGCTTCTG  | CTGAATCATTGCTTCTGCGA  |
|                                           | AamerSigP-35954<br>(GI:759088829) | TTAATACAGCAAATCACCGCC | TACCGGTGATAGATGCCTCC  |
|                                           | AamerSigP-15297<br>(GI:759089247) | GGCATCAATGGAAGTTGCTT  | GTGTGTGAACGGACTGAACG  |
|                                           | AamerSigP-39321                   | AGCTGCTGTCATTCACCCTT  | ATCCATGTTGTGTGCCGTC   |
|                                           | AamerSigP-22563                   | TGAATGTCGCTTTGTTCTGC  | GTTTGCATCTGACCTCCCAT  |
| Immunity Related Proteins                 | Aam-12127<br>(GI:759085065)       | AGACGAACTAAACGCAAGGG  | GTTTTTGTTTAGGAACGCGG  |
|                                           | Aam-31196                         | TTCAGATGGTGACCCAAACA  | AAAGCACACGCTTTCATCCT  |
|                                           | Aam-6020<br>(GI:759087765)        | GTTATCTGGTGGTTGCGGTC  | ACCATGGATTATTGTTGCCG  |
|                                           | Aam-40185<br>(GI:759087775)       | ACGTCCTCTGGTATATGCGG  | CCACCAATGTTCTCCTACGC  |
|                                           | AamerSigP-41992                   | TCAAGTCGTGCGTTACCTTG  | CGTGATGTTTCGGTGAGCTA  |
| Other Proteins                            | Aam-22013                         | TGTTCTCCCATCAACATCA   | TTTTGCCTTCAAGGTGCTTC  |

|                  |                                   |                                                    |                                                       |
|------------------|-----------------------------------|----------------------------------------------------|-------------------------------------------------------|
|                  |                                   |                                                    |                                                       |
|                  | Aam-40687<br>(GI:759087721)       | GCGAGCAAGAAAAGGATGAC                               | TTCGACGAAGCAATCAACAG                                  |
|                  | AamerSigP-25878<br>(GI:759089279) | TACGAGCTCTCGAGGTCCAT                               | GGCATTTCCTCAATCTATCA                                  |
|                  | Aam-5252                          | GGCTGAGATCGAGAAATTCG                               | CCTGCTTGCTTCTCCTGTTC                                  |
| Metalloproteases | AamerSigP-41953<br>(GI:759090217) | GATGCCAGCCAAGAACAGAT                               | TGCCAGTCAACTGTTTCCAG                                  |
|                  | AamerSigP-41680<br>(GI:759090211) | GACGCTCAACTTGGAAGGAG                               | GTTGCGCTCAATCTCGTGTA                                  |
|                  | AamerSigP-20700<br>(GI:759088021) | CTCTGCTTTTTGCAGCTGTG                               | CTCGTTTCCGTCATACAGCA                                  |
|                  | Aam-41579<br>(GI:759090035)       | TGGAATCGAGGATATCAGCC                               | TTTGTCCATGCCAGTAACCA                                  |
|                  | AamerSigP-35996<br>(GI:759090059) | GACGCTCAACTTGGAAGGAG                               | TCATTTGCTCAATCTCGTG                                   |
|                  | Aam-41580<br>(GI:759086485)       | ACGAAGAAAAGATCGCCTCA                               | TGGCTGATATCCTCGATTCC                                  |
| Other Primers    | Reprolysin Family                 | CACGATGACCTGACGCTCAA                               | GCTCAATCTCGTGTATCA                                    |
|                  | T7 Flanking                       | GAATTAATACGACTCACTATAGGG<br>AGAACGATCACCTGACGCTCAA | GCTCAATCTCGTGTATCAGAAT<br>TAATACGACTCACTATAGGGAG<br>A |
|                  | 16S rRNA                          | AGAGTTTGATCCTGGCTCAG                               | CATGCTGCCTCCCGTAGGAGT                                 |
